# Supplementary material for: An arginine-rich cell penetrating peptide contained anti-gelatinase scFv-LDM fusion protein shows potent antitumor efficacy in pancreatic cancer
Source: PubMed Central journal article supplement — J Cancer. 2018 Jan 8;9(4):674–82. doi: 10.7150/jca.22277 (PMC5858489; doi:10.7150/jca.22277), 2018-01-08
Supplement: jcav09p0674s1.pdf [file jcav09p0674s1.pdf]

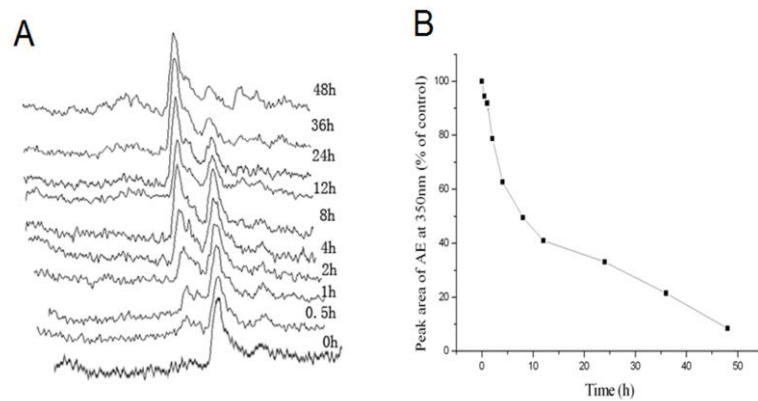

Figure S1. Thermal stability of active chromophore (AE) of lidamycin in PBS buffer at 37°C for different time-point. A was the detection of AE monitoring at 350 nm using RP-HPLC, which demonstrated the deactivation of AE and then the shift of the peak on the chromatography. B was the ratio of AE in different time as calculated by the area under curve in HPLC, which suggested the deactivation of AE with the prolongation of time and less than 20% AE was remained at 48 h.
